# Supplementary material for: Effect of different natural plasticizers on Ethyl Cellulose Oleogel bioplastic
Source: Research Square preprint supplement (doi:10.21203/rs.3.rs-7490012/v1), 2025-09-15
Supplement: Supplementary file 1 [file f025c56fe289b3d3929f5d04.docx]

**Supplementary Section**

**TRACTION CURVES**

**
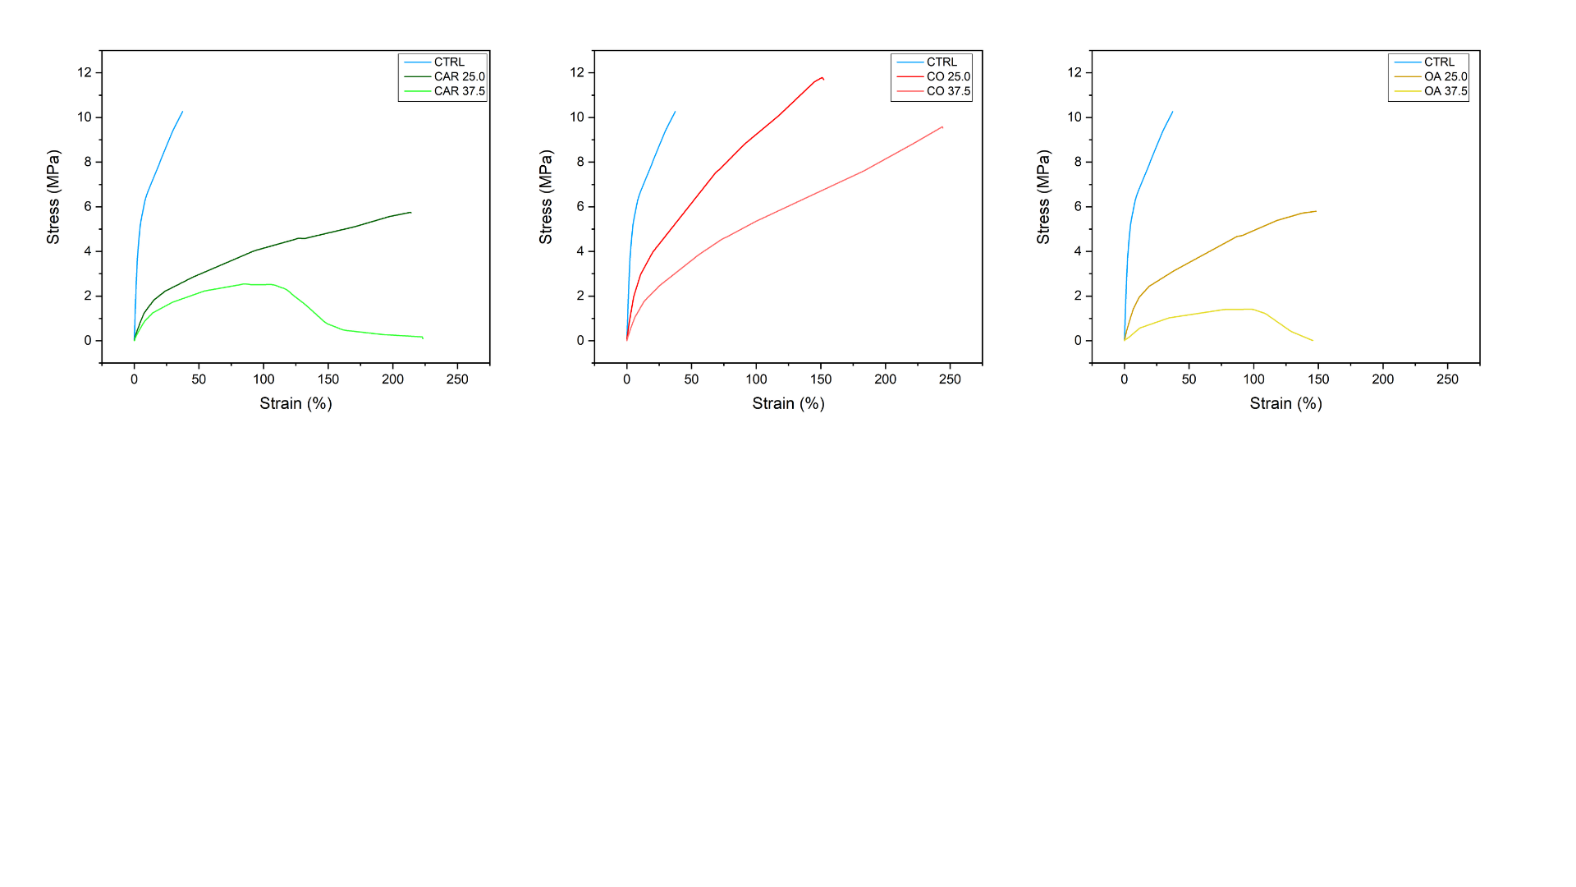
**

S.1 Traction curves by plasticizer.

**CYCLICAL COMPRESSION**

**
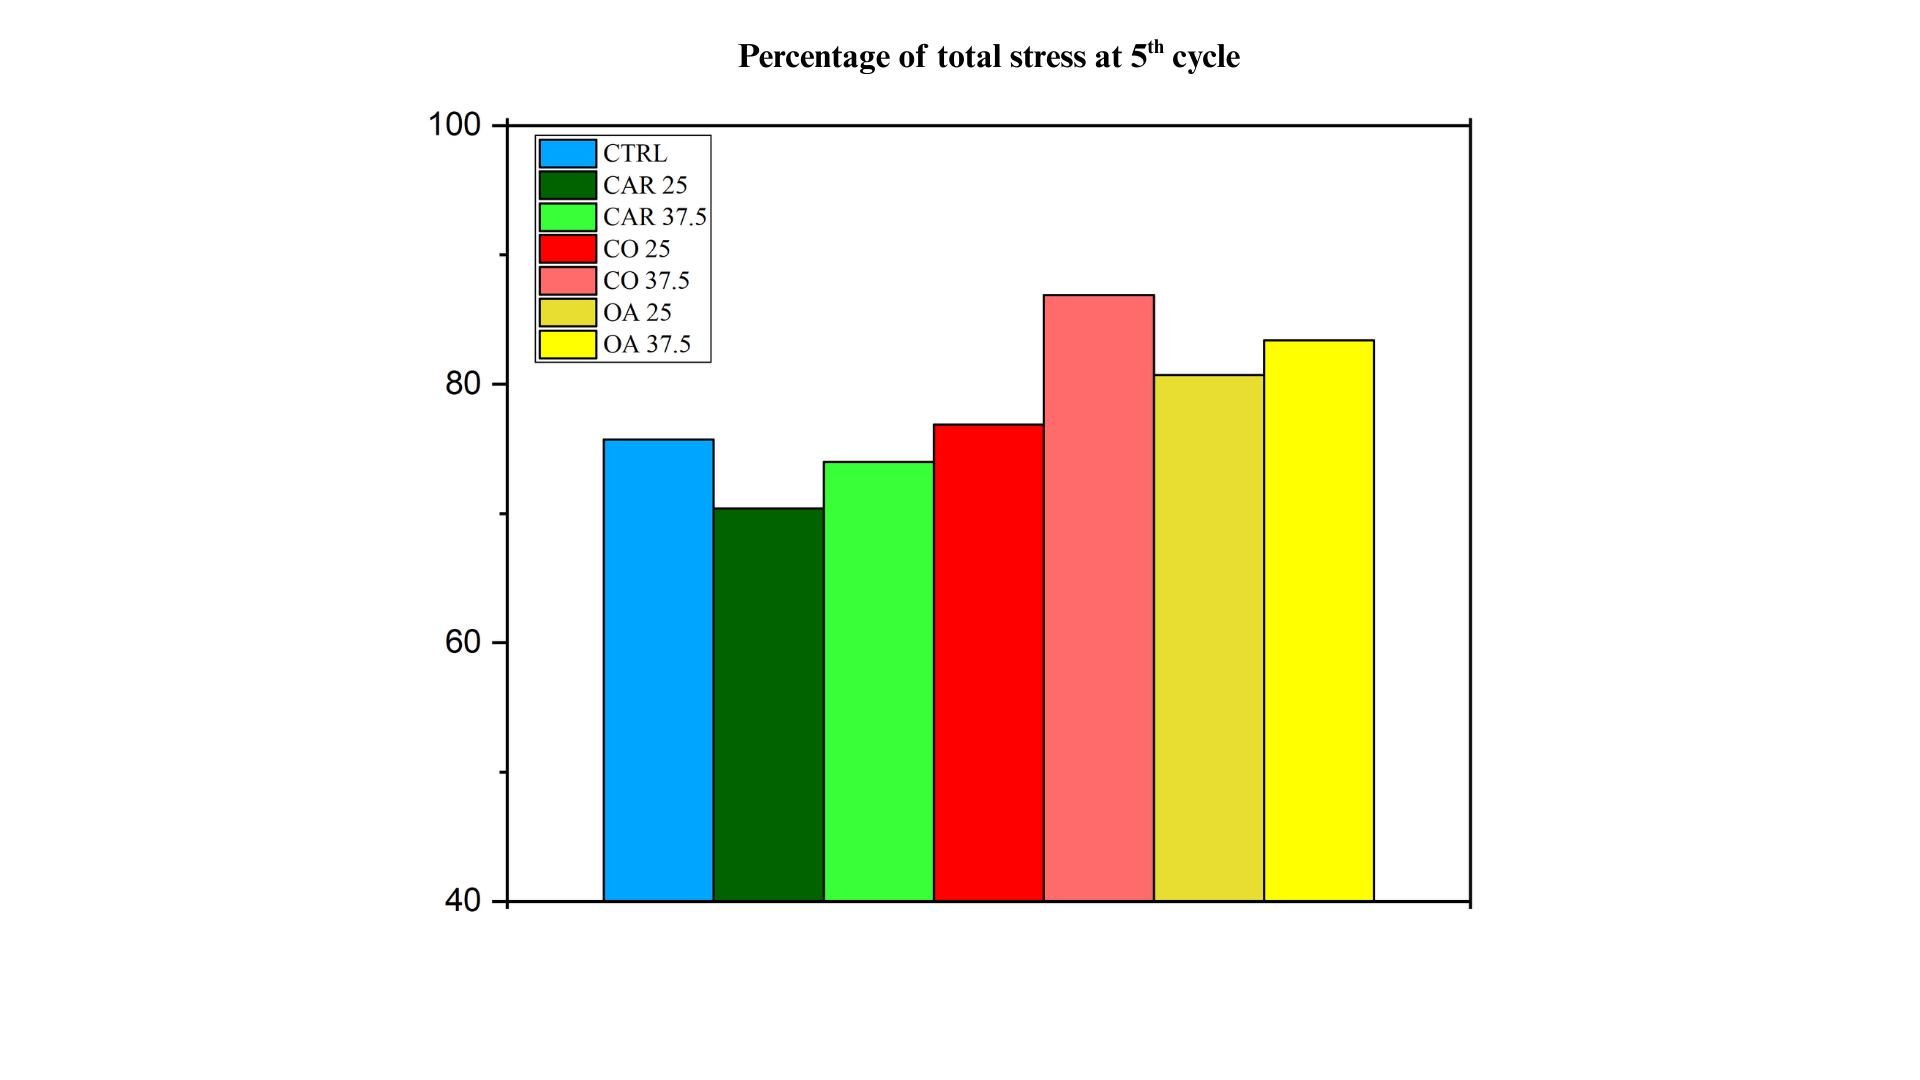
**

S.2 The histogram represents the percentage at 5th cycle of the final residual stress.

**CONTACT ANGLE**

**
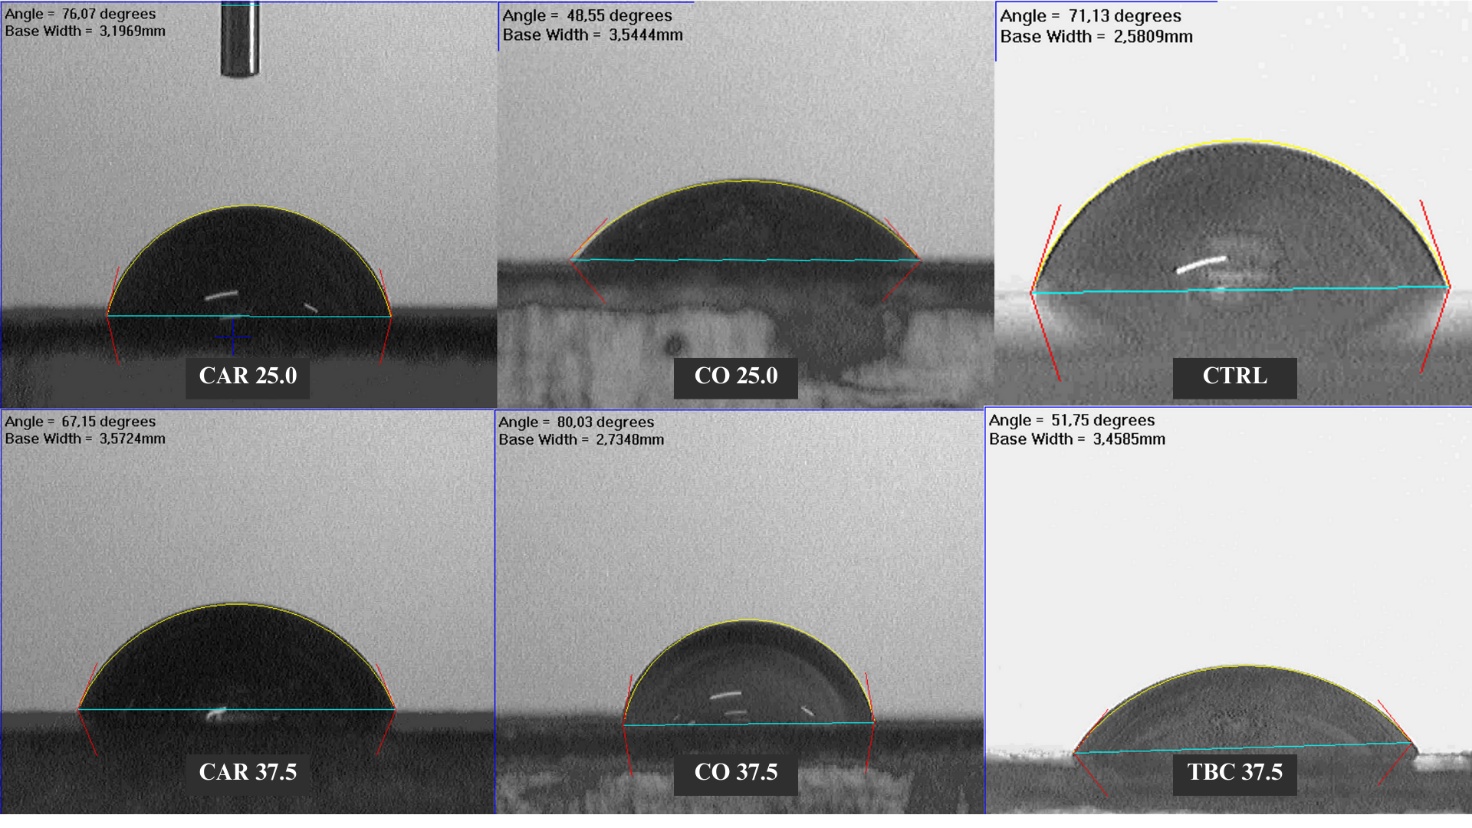
**

S.3. Sessile drop over plasticized Oleogel, from the left to the right and from up to bottom, respectively, Cardanol 25.0%, Casto Oil 25.0%, Control Oleogel, Cardanol 37.5%, Castor Oil 37.5% and Tributyl Citrate 37.5%.

**
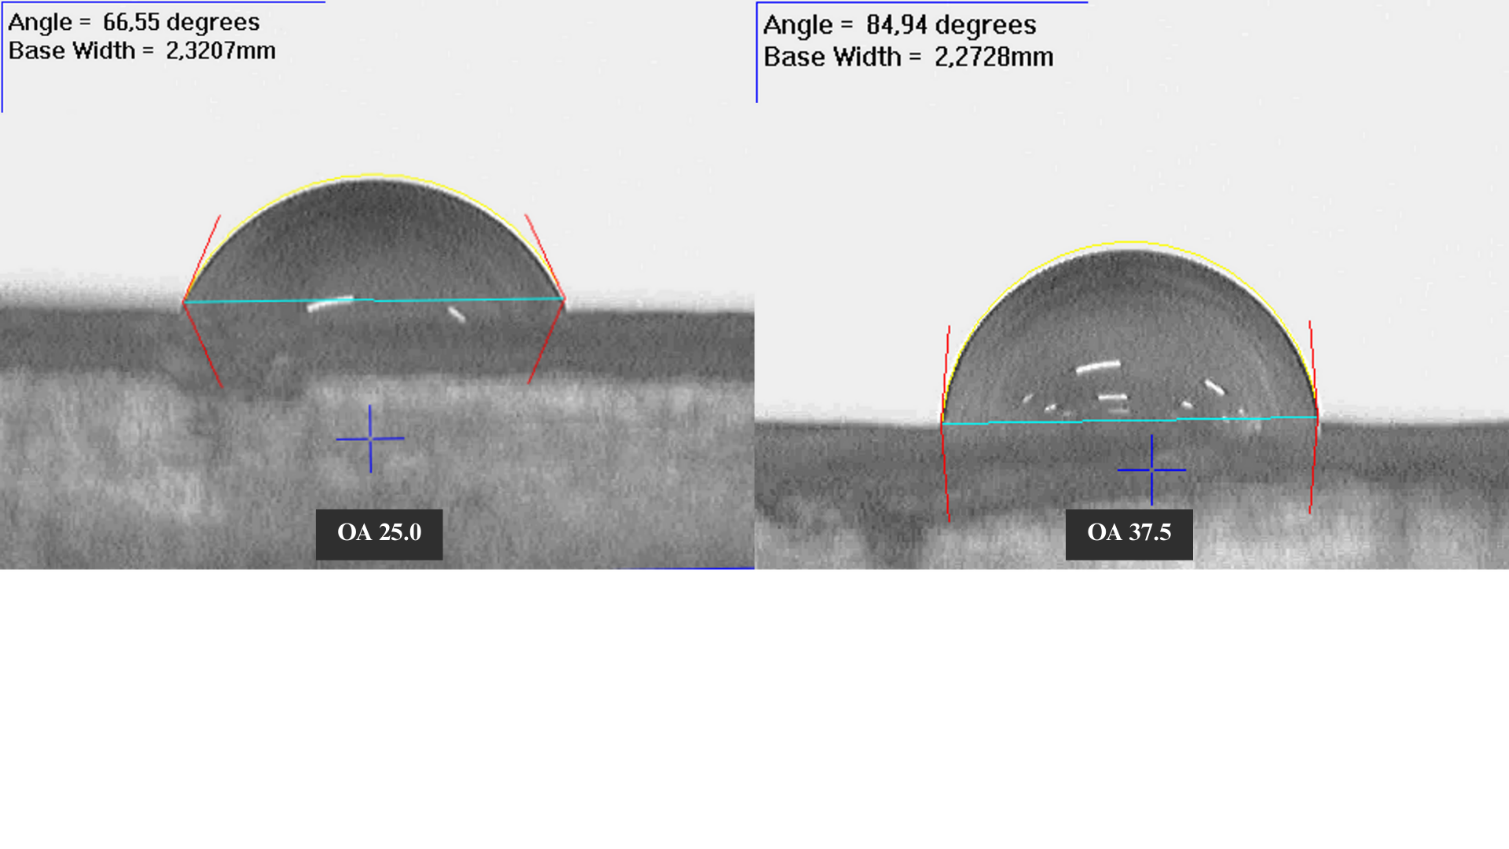
**

S.4 Sessile drop over plasticized Oleogel with Oleic Acid (25% on the left, 37.5% on the right).

**FTIR- ATR**

**
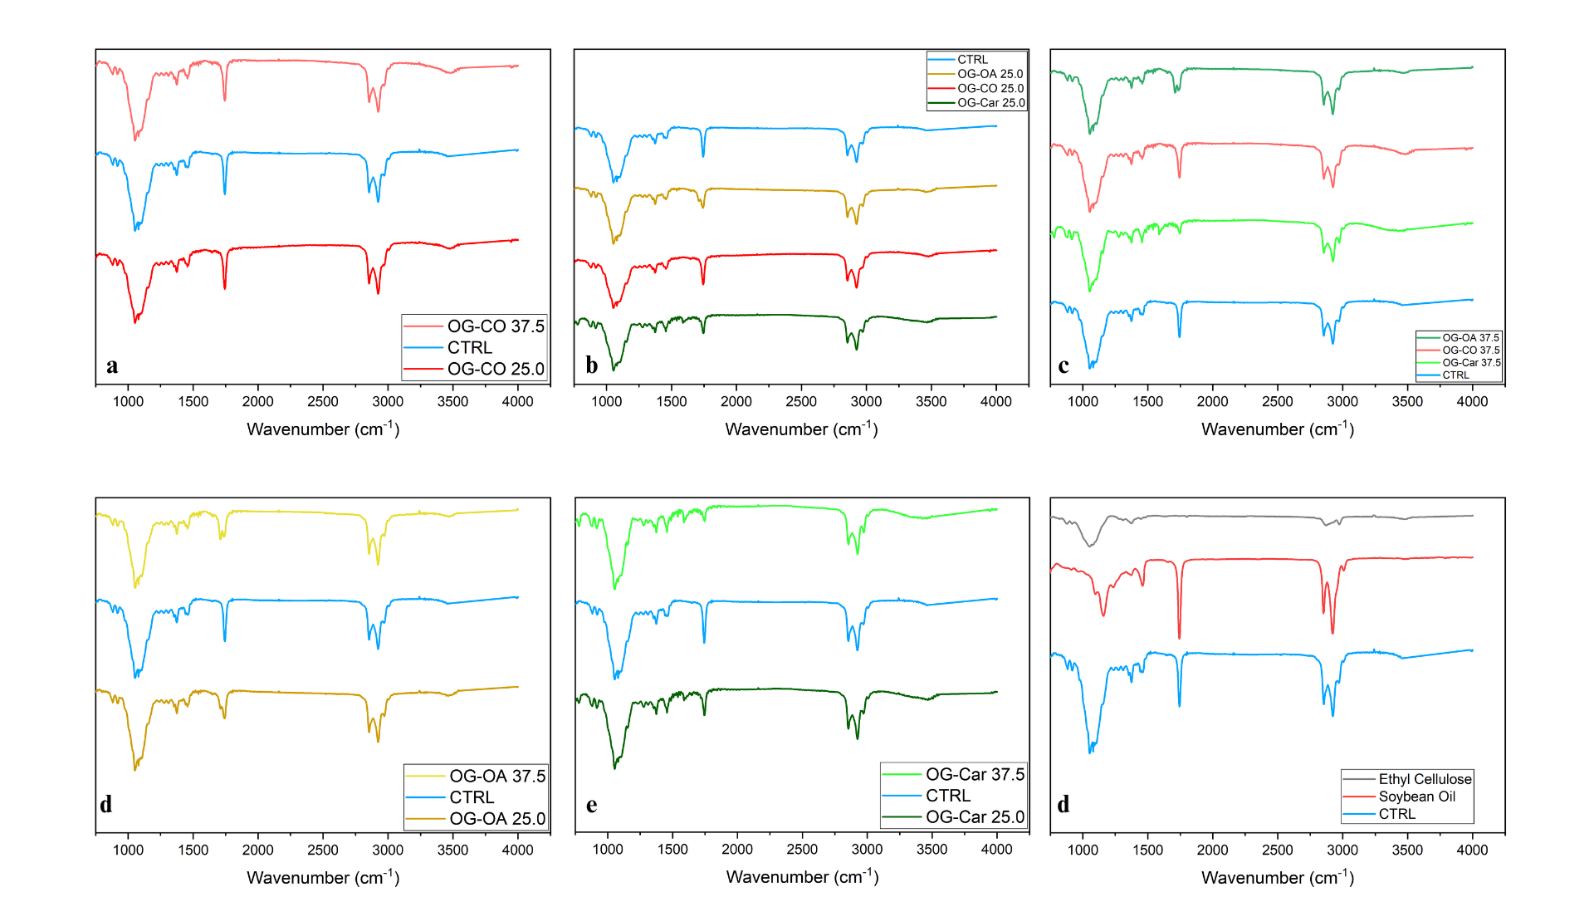
**

S.5 The base Oleogel and the Oleogels with plasticizers show FTIR spectra are the sum of the spectra of the individual components.

**
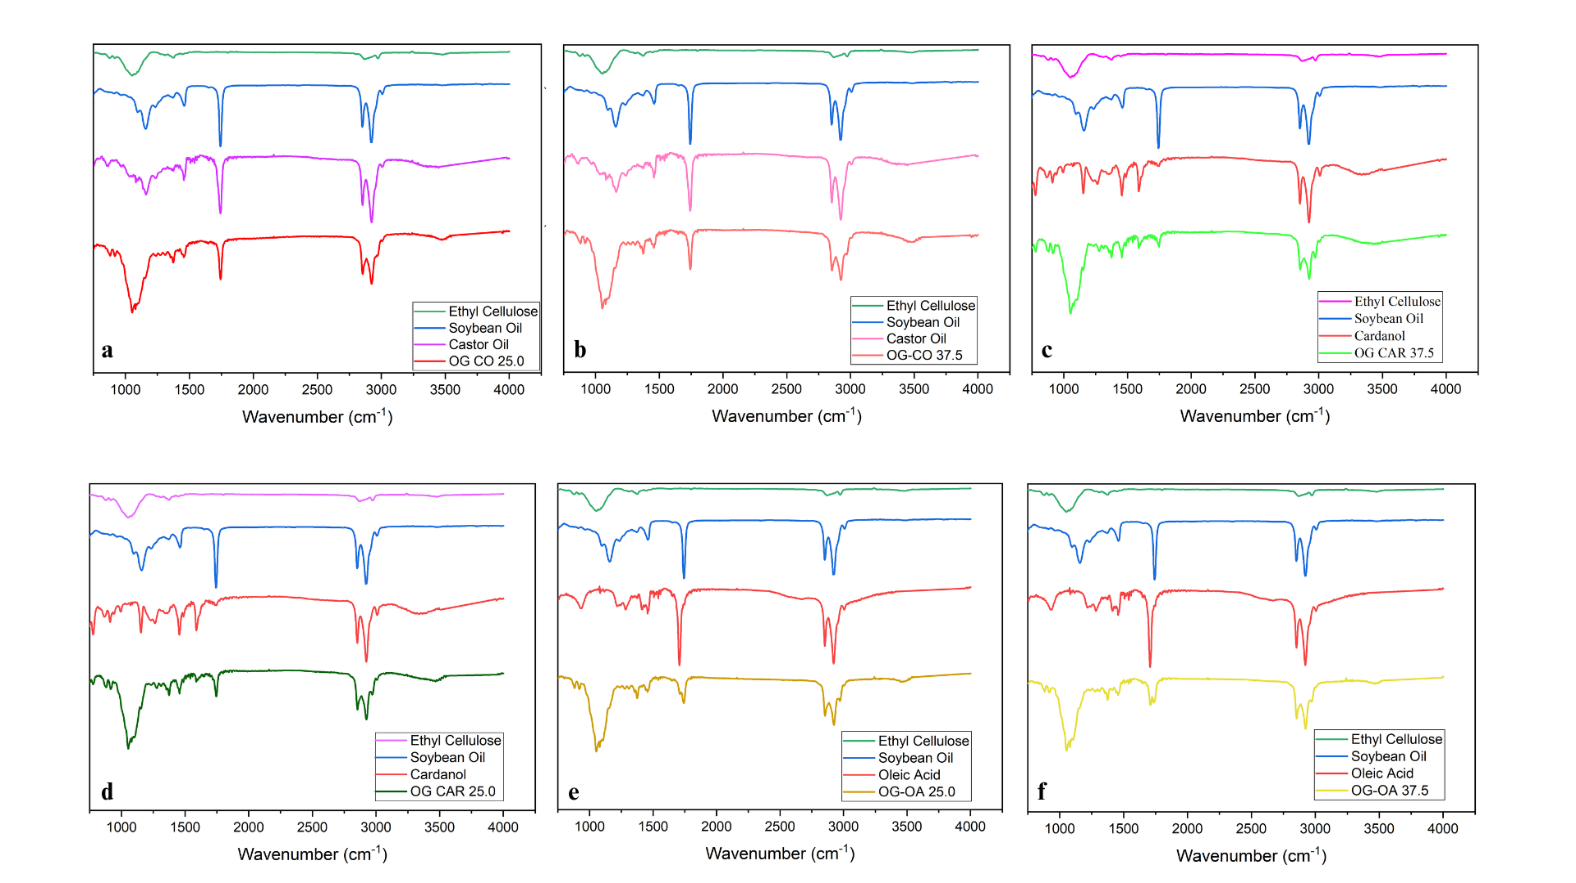
**

S.6 The base Oleogel and the Oleogels with plasticizers show FTIR spectra are the sum of the spectra of the individual components.

**GELATION TEMPERATURE**

**
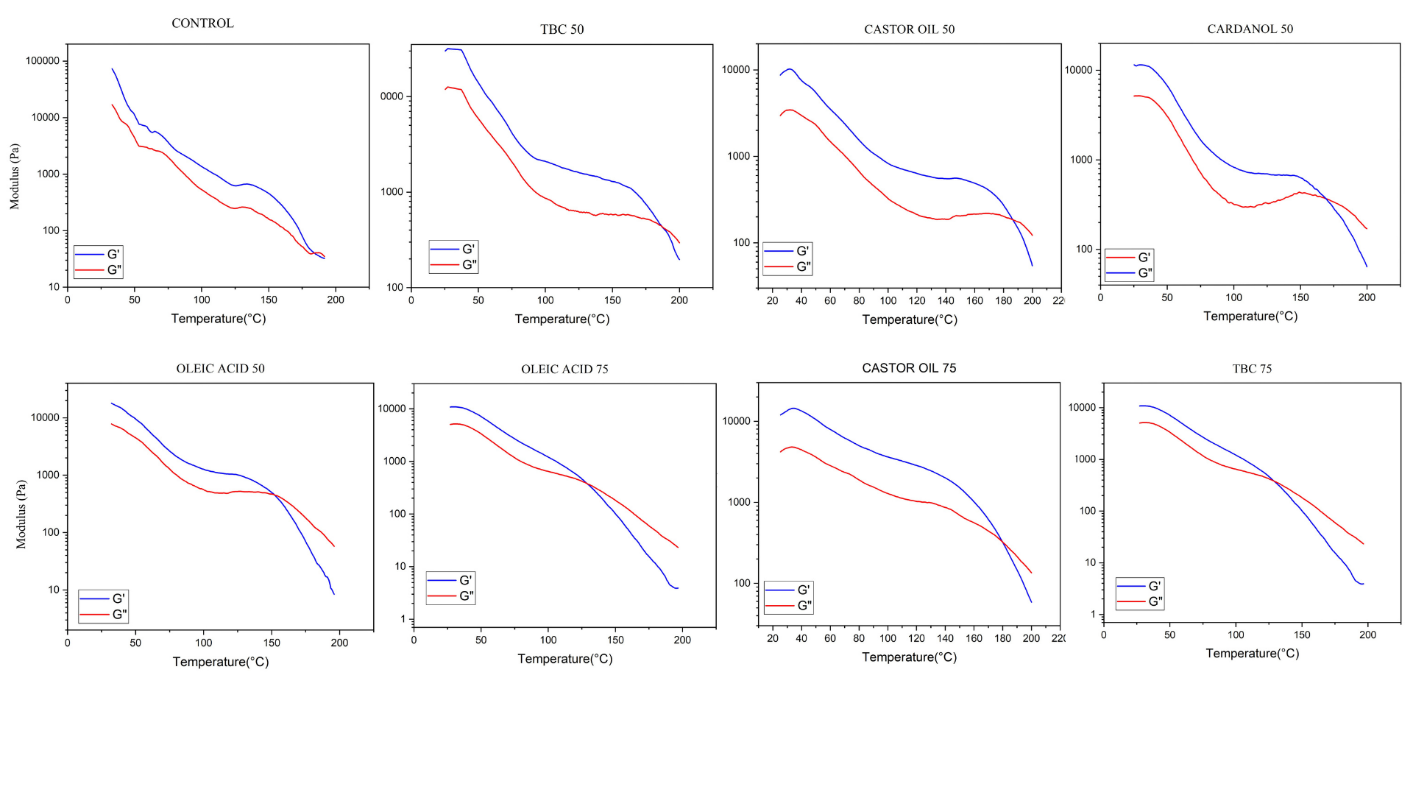
**

S.7 The gelation temperature decreases proportionally to the amount of plasticizers used in the Oleogel.

**DSC-DTA**

Differential scanning calorimetry – differential thermal analyses show the transition of Oleogel from a solid-like to a fluid-like starts around 150°C.
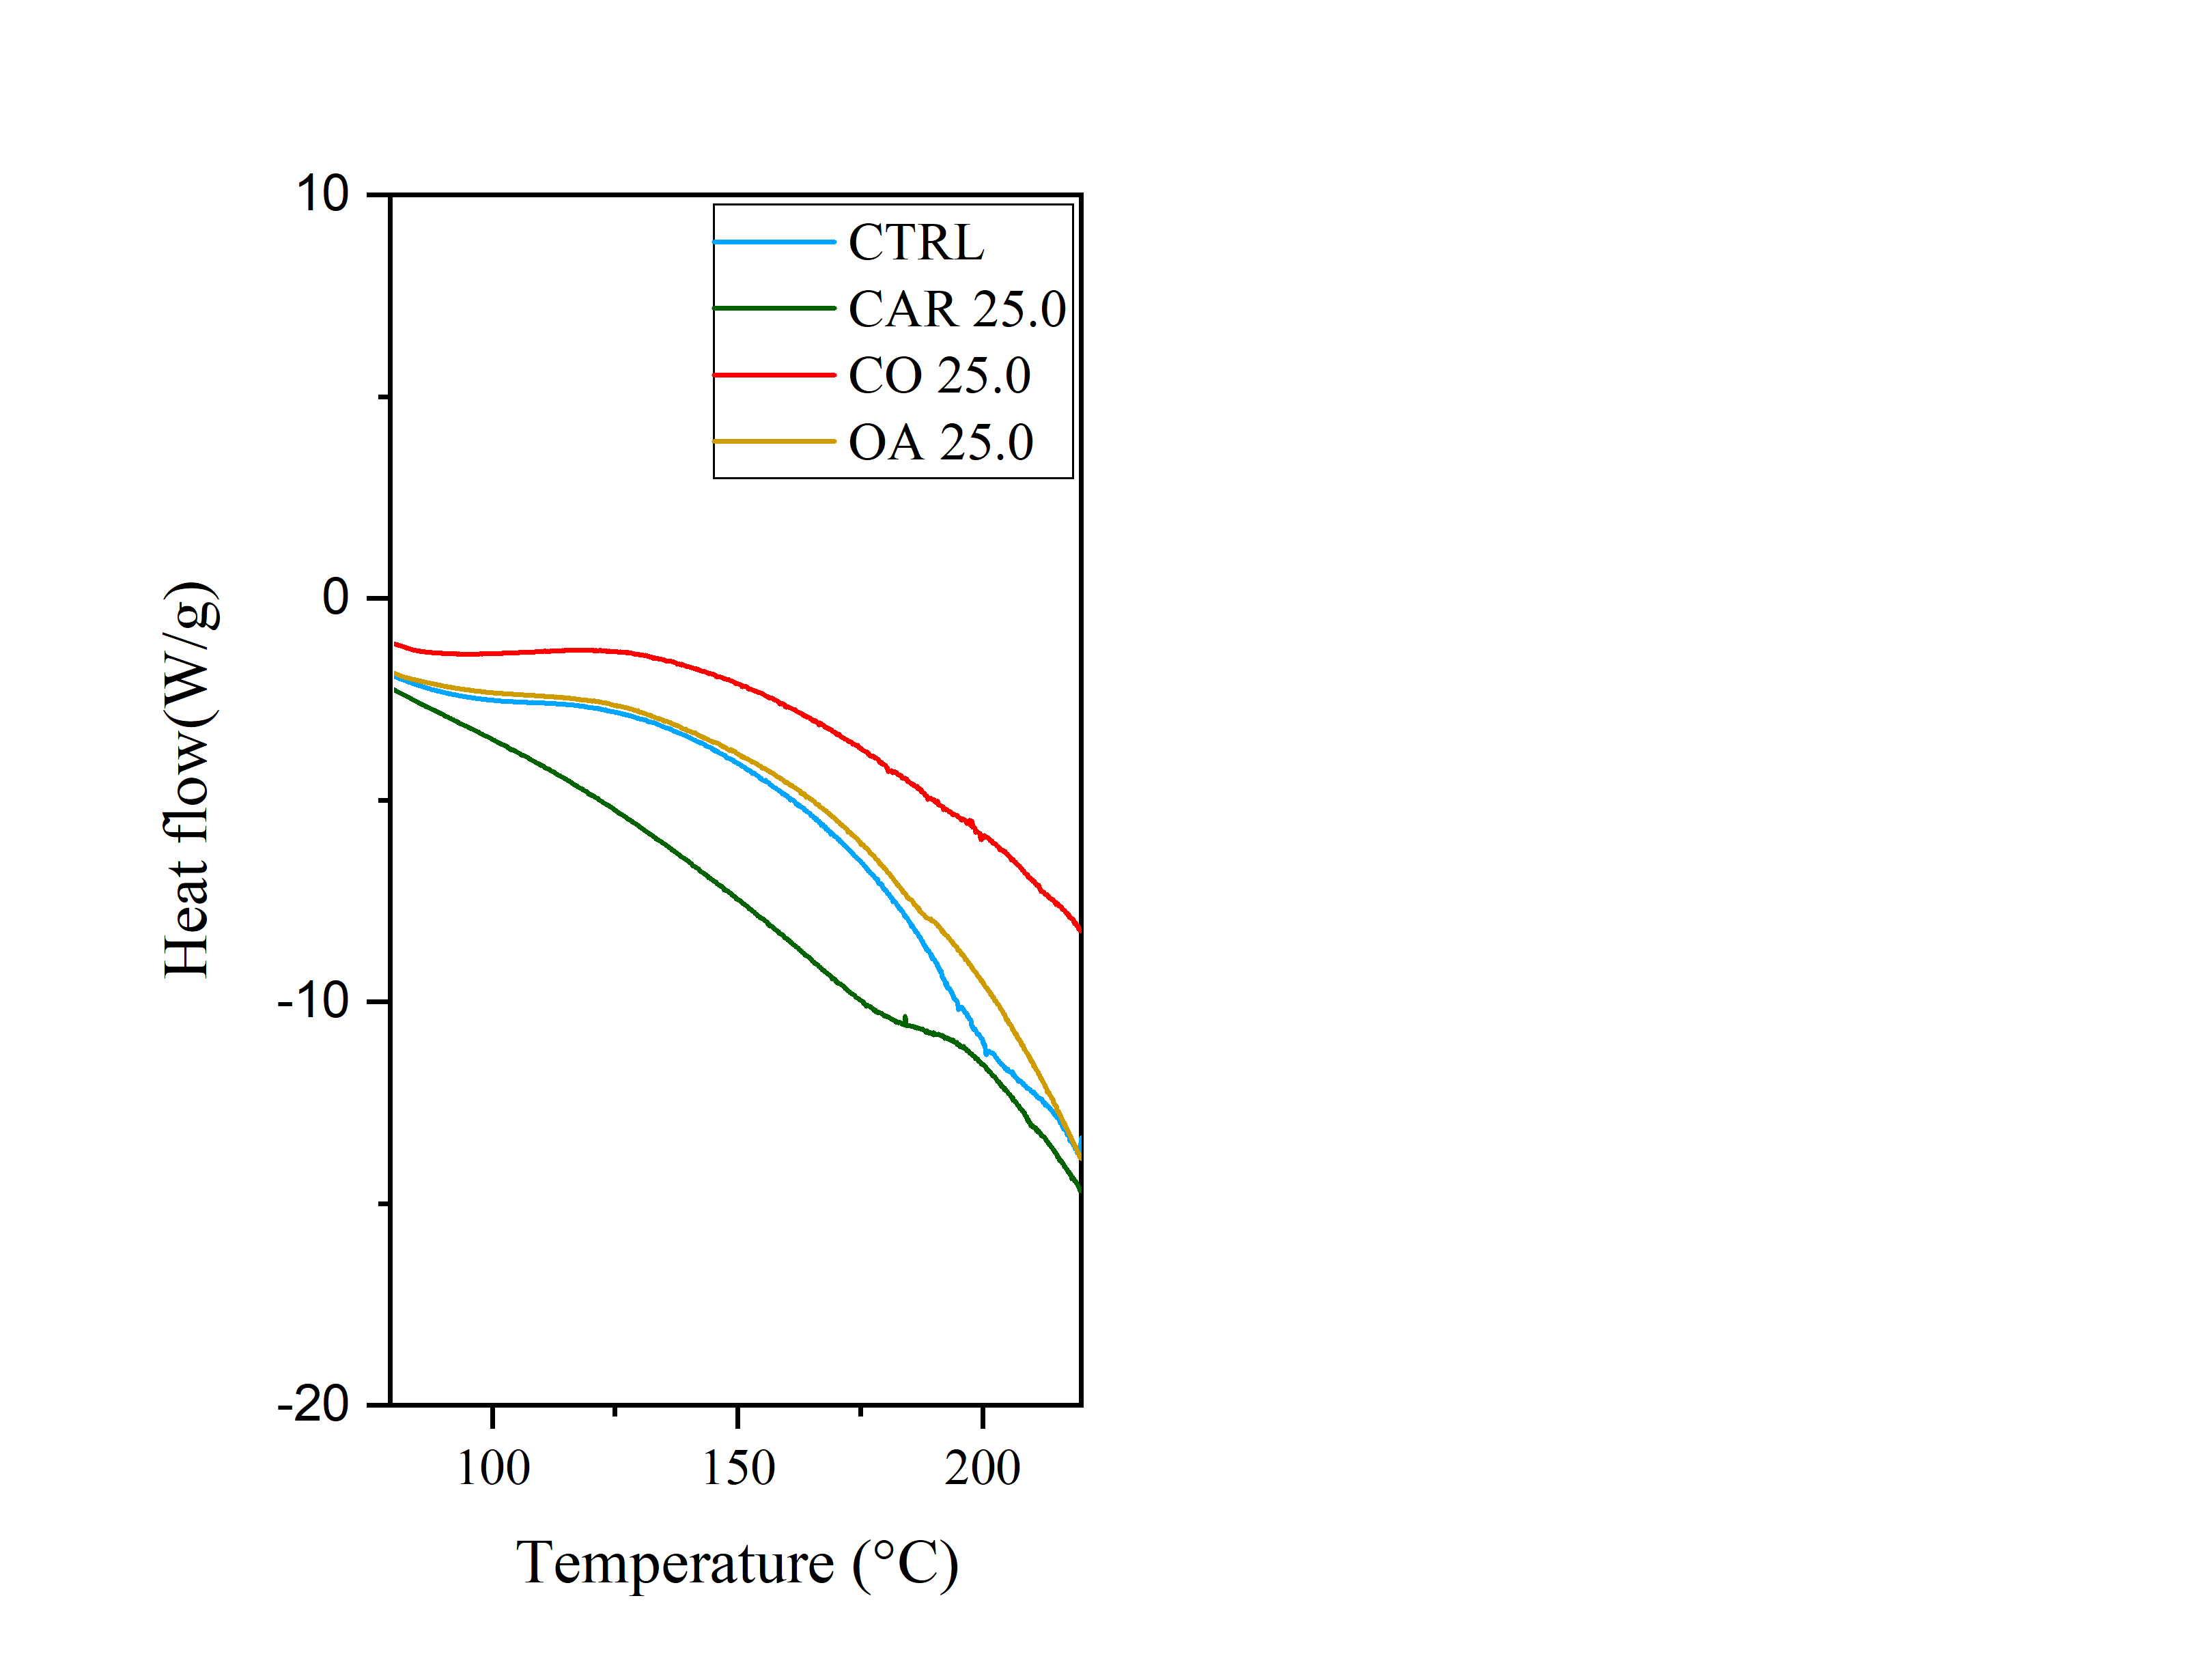


S.8 The thermal event which detects the transition between solid-like to liquid-like is centred around 150°C.
